# Supplementary material
Source: MDPI journal article supplement (https://www.mdpi.com/2072-4292/11/5/490)
Supplement: s1 [file s1]

# Supplementary Materials: Article Mapping Annual Forest Change Due to Afforestation in Guangdong Province of China Using Active and Passive Remote Sensing Data. *Remote Sensing* 2019, 2, Article No. remotesensing-447587

Wenjuan Shen <sup>1,2</sup>, Mingshi Li <sup>1,2,\*</sup>, Chengquan Huang <sup>3</sup>, Xin Tao <sup>4</sup>, Shu Li <sup>5</sup> and Anshi Wei <sup>6</sup>

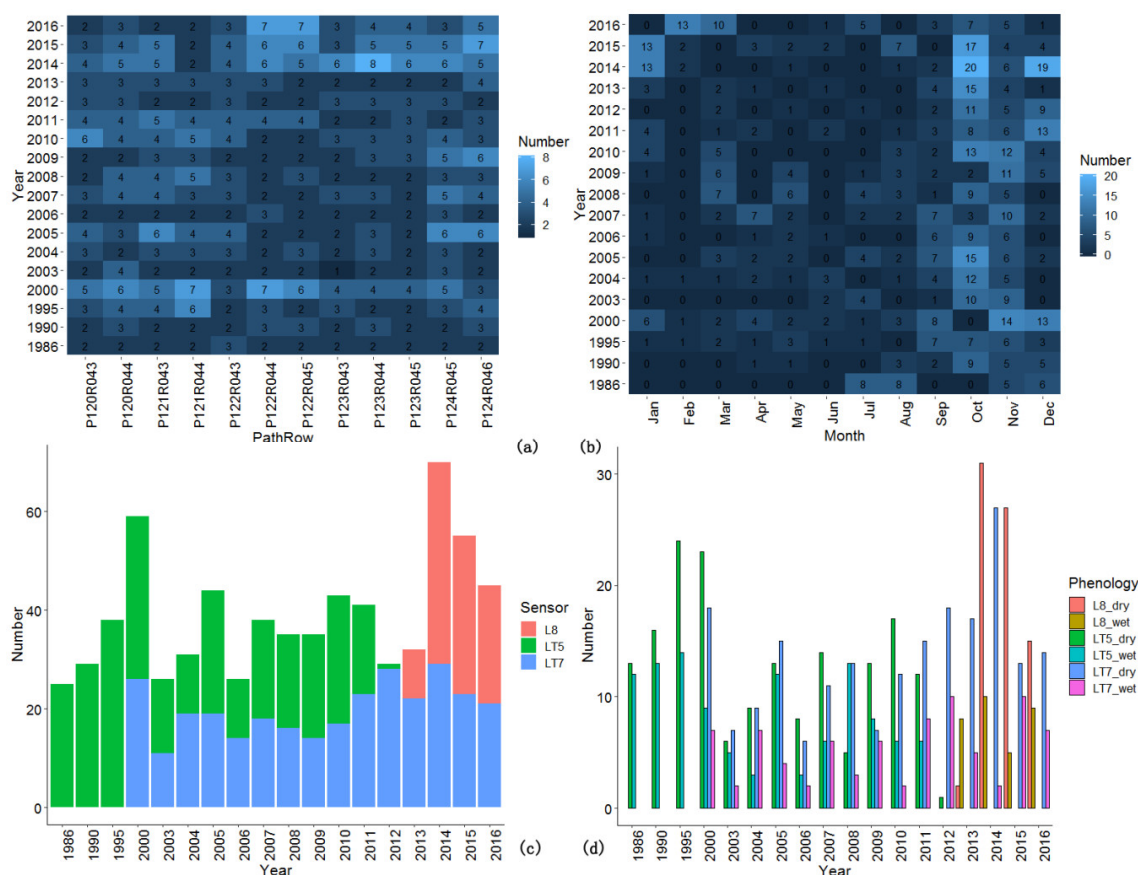

**Figure S1.** Statistics of the number of Landsat images used by (a) 12paths/rows, (b) 12 months, (c) 3 sensors, and (d) dry season and wet season from Shen et al. (2018).

**Code S1.** Taking a case of PALSAR-based SVM land cover type classification by traditional classification and parallel processing classification techniques

```
#####P122R043-2007#####

#####Traditional classification#####

setwd("K:\\FNF_classification")

folder <- getwd()

#read trainroi

mytrainroi = read.table (".\\roi_mean_extractions_new\\12pathrow07_16_5roi_values.csv_
TRAIN.csv", sep = ",", header = T)

mytrain <- data.frame(mytrainroi)

mytrain.subset <- mytrain[,c(2:2,8:19)]

svmmodel <- svm(category~.,data=mytrain.subset,kernel="radial",

               gamma=1,cost=1,type="C-classification")

#####Parallel processing classification #####

#read stackedGLCM

filename <- list.files (".\\122043\\2007",

                      pattern = glob2rx("*HH*HV*GLCM*crop*tif"),

                      recursive = TRUE, full.names = TRUE)

filename

predictors=raster::brick(filename)

predictors

names(predictors)=c("HH","HV","Ratio","Difference",

                  "HV_Mean","HV_Variance")

#register parallel computing backend

library(doParallel)

ncores = 4

cl = parallel::makeCluster(ncores)

doParallel::registerDoParallel(cl,cores)

#compute indices for data splitting

rows = 1:nrow(predictors)
```

```

split = sort(rows%%ncores)+1

outname = "prediction1220432007"

pt <- proc.time()

#perform the prediction on subsets of the predictor dataset

library(foreach)

prediction1220432007 = foreach(i=unique(split), .combine=c,.packages = c("e1071"))%dopar%{

rows_sub = rows[split==i]

sub= = raster::crop (predictors,raster::extent(predictors,min(rows_sub), max(rows_sub), 1, ncol
(predictors))) raster::predict (sub,svmmodel,filename = paste (outname, i, sep = "_"), overwrite=TRUE)

} #sub: split stackimage; rows_sub:

proc.time()-pt

stopCluster(cl)

## This will write different files with a suffix "_1" to "_{ncores}"

## which can then easily mosaicked back together along the y-axis

filename2 <- list.files(".",

pattern = glob2rx("*prediction1220432007*grd"),

recursive = TRUE,full.names = TRUE)

filename2

m1<-mosaic(raster(filename2[1]),raster(filename2[2]),

raster(filename2[3]),raster(filename2[4]),fun=mean)

writeRaster (m1, file.path ('./122043', filename = paste0 ("1220432007", "_SVM", ".tiff", sep = "")), format
="GTiff", dataType = 'INT2S',overwrite = TRUE)

#####END#####

```

**Table S1.** The accuracy assessment of land cover classification in 2007 and 2016 <sup>1</sup>.

| SVM                     | Class | Ground Truth ROIs (2007) |        |        |        |        | Total Classified ROIs                             | User Accuracy (%) | Commission Error (%) |
|-------------------------|-------|--------------------------|--------|--------|--------|--------|---------------------------------------------------|-------------------|----------------------|
|                         |       | C                        | F      | O      | U      | W      |                                                   |                   |                      |
| Classification          | C     | 206                      | 1      | 22     | 23     | 2      | 254                                               | 81.10%            | 18.90%               |
|                         | F     | 19                       | 456    | 86     | 20     | 2      | 583                                               | 78.22%            | 21.78%               |
|                         | O     | 211                      | 68     | 291    | 138    | 72     | 780                                               | 37.31%            | 62.69%               |
|                         | U     | 71                       | 30     | 55     | 376    | 16     | 548                                               | 68.61%            | 31.39%               |
|                         | W     | 1                        | 0      | 13     | 1      | 109    | 124                                               | 87.90%            | 12.10%               |
| Total Ground Truth ROIs |       | 508                      | 555    | 467    | 558    | 201    | Kappa coefficient = 0.524                         |                   |                      |
| Producer Accuracy (%)   |       | 40.55%                   | 82.16% | 62.31% | 67.38% | 54.23% | Overall Accuracy = 62.82% (95% CI: 60.81%–64.81%) |                   |                      |
| Omission error (%)      |       | 59.45%                   | 17.84% | 37.69% | 32.62% | 45.77% |                                                   |                   |                      |

  

| SGB                     | Class | Ground Truth ROIs (2007) |        |        |        |        | Total Classified ROIs                            | User Accuracy (%) | Commission Error (%) |
|-------------------------|-------|--------------------------|--------|--------|--------|--------|--------------------------------------------------|-------------------|----------------------|
|                         |       | C                        | F      | O      | U      | W      |                                                  |                   |                      |
| Classification          | C     | 233                      | 1      | 32     | 32     | 4      | 302                                              | 77.15%            | 22.85%               |
|                         | F     | 18                       | 417    | 66     | 18     | 2      | 521                                              | 80.04%            | 19.96%               |
|                         | O     | 186                      | 100    | 291    | 121    | 55     | 753                                              | 38.65%            | 61.35%               |
|                         | U     | 70                       | 35     | 57     | 386    | 11     | 559                                              | 69.05%            | 30.95%               |
|                         | W     | 1                        | 2      | 21     | 1      | 129    | 154                                              | 83.77%            | 16.23%               |
| Total Ground Truth ROIs |       | 508                      | 555    | 467    | 558    | 201    | Kappa coefficient = 0.535                        |                   |                      |
| Producer Accuracy (%)   |       | 45.97%                   | 75.14% | 62.31% | 69.18% | 64.18% | Overall Accuracy = 63.61% (95% CI: 61.6%–65.58%) |                   |                      |
| Omission error (%)      |       | 54.03%                   | 24.86% | 37.69% | 30.82% | 35.82% |                                                  |                   |                      |

  

| RF                      | Class | Ground Truth ROIs (2007) |        |        |        |        | Total Classified ROIs                             | User Accuracy (%) | Commission Error (%) |
|-------------------------|-------|--------------------------|--------|--------|--------|--------|---------------------------------------------------|-------------------|----------------------|
|                         |       | C                        | F      | O      | U      | W      |                                                   |                   |                      |
| Classification          | C     | 211                      | 1      | 21     | 31     | 2      | 266                                               | 79.32%            | 20.68%               |
|                         | F     | 18                       | 296    | 42     | 12     | 0      | 368                                               | 80.43%            | 19.57%               |
|                         | O     | 204                      | 205    | 316    | 139    | 60     | 924                                               | 34.20%            | 65.80%               |
|                         | U     | 74                       | 51     | 64     | 375    | 9      | 573                                               | 65.45%            | 34.55%               |
|                         | W     | 1                        | 2      | 24     | 1      | 130    | 158                                               | 82.28%            | 17.72%               |
| Total Ground Truth ROIs |       | 508                      | 555    | 467    | 558    | 201    | Kappa coefficient = 0.466                         |                   |                      |
| Producer Accuracy (%)   |       | 41.54%                   | 53.33% | 67.67% | 67.20% | 64.68% | Overall Accuracy = 58.02% (95% CI: 55.96%–60.05%) |                   |                      |
| Omission error (%)      |       | 58.46%                   | 46.67% | 32.33% | 32.80% | 35.32% |                                                   |                   |                      |

  

| C5.0                    | Class | Ground Truth ROIs (2007) |        |        |        |        | Total Classified ROIs                             | User Accuracy (%) | Commission Error (%) |
|-------------------------|-------|--------------------------|--------|--------|--------|--------|---------------------------------------------------|-------------------|----------------------|
|                         |       | C                        | F      | O      | U      | W      |                                                   |                   |                      |
| Classification          | C     | 223                      | 2      | 32     | 32     | 7      | 296                                               | 75.34%            | 24.66%               |
|                         | F     | 20                       | 422    | 74     | 18     | 2      | 536                                               | 78.73%            | 21.27%               |
|                         | O     | 184                      | 97     | 279    | 133    | 54     | 747                                               | 37.35%            | 62.65%               |
|                         | U     | 80                       | 31     | 53     | 374    | 8      | 546                                               | 68.50%            | 31.50%               |
|                         | W     | 1                        | 3      | 29     | 1      | 130    | 164                                               | 79.27%            | 20.73%               |
| Total Ground Truth ROIs |       | 508                      | 555    | 467    | 558    | 201    | Kappa coefficient = 0.520                         |                   |                      |
| Producer Accuracy (%)   |       | 43.90%                   | 76.04% | 59.74% | 67.03% | 64.68% | Overall Accuracy = 62.39% (95% CI: 60.36%–64.37%) |                   |                      |
| Omission error (%)      |       | 56.10%                   | 23.96% | 40.26% | 32.97% | 35.32% |                                                   |                   |                      |

| SVM                     | Class | Ground Truth ROIs (2016) |        |        |        |       | Total Classified ROIs                                                        | User Accuracy (%) | Commission Error (%) |
|-------------------------|-------|--------------------------|--------|--------|--------|-------|------------------------------------------------------------------------------|-------------------|----------------------|
|                         |       | C                        | F      | O      | U      | W     |                                                                              |                   |                      |
| Classification          | C     | 277                      | 17     | 119    | 33     | 1     | 447                                                                          | 61.97%            | 38.03%               |
|                         | F     | 24                       | 384    | 56     | 22     | 1     | 487                                                                          | 78.85%            | 21.15%               |
|                         | O     | 189                      | 44     | 343    | 73     | 69    | 718                                                                          | 47.77%            | 52.23%               |
|                         | U     | 98                       | 101    | 104    | 503    | 22    | 828                                                                          | 60.75%            | 39.25%               |
|                         | W     | 0                        | 0      | 16     | 0      | 93    | 109                                                                          | 85.32%            | 14.68%               |
| Total Ground Truth ROIs |       | 588                      | 546    | 635    | 631    | 186   | Kappa coefficient = 0.505<br>Overall Accuracy = 61.8% (95% CI: 59.9%–63.68%) |                   |                      |
| Producer Accuracy (%)   |       | 47.11%                   | 70.33% | 53.76% | 79.71% | 50.0% |                                                                              |                   |                      |
| Omission error (%)      |       | 52.89%                   | 29.67% | 46.24% | 20.29% | 50.0% |                                                                              |                   |                      |

| SGB                     | Class | Ground Truth ROIs (2016) |        |        |        |        | Total Classified ROIs                                                           | User Accuracy (%) | Commission Error (%) |
|-------------------------|-------|--------------------------|--------|--------|--------|--------|---------------------------------------------------------------------------------|-------------------|----------------------|
|                         |       | C                        | F      | O      | U      | W      |                                                                                 |                   |                      |
| Classification          | C     | 258                      | 9      | 96     | 30     | 1      | 394                                                                             | 65.48%            | 34.52%               |
|                         | F     | 14                       | 363    | 42     | 13     | 0      | 432                                                                             | 84.03%            | 15.97%               |
|                         | O     | 227                      | 63     | 381    | 97     | 52     | 820                                                                             | 46.46%            | 53.54%               |
|                         | U     | 88                       | 111    | 103    | 491    | 16     | 809                                                                             | 60.69%            | 39.31%               |
|                         | W     | 1                        | 0      | 16     | 0      | 116    | 133                                                                             | 87.22%            | 12.78%               |
| Total Ground Truth ROIs |       | 588                      | 546    | 635    | 631    | 186    | Kappa coefficient = 0.510<br>Overall Accuracy = 62.17% (95 % CI: 60.27%–64.04%) |                   |                      |
| Producer Accuracy (%)   |       | 43.88%                   | 66.48% | 59.72% | 77.81% | 62.70% |                                                                                 |                   |                      |
| Omission error (%)      |       | 56.12%                   | 33.52% | 40.28% | 22.19% |        |                                                                                 |                   |                      |

| RF                      | Class | Ground Truth ROIs (2016) |        |        |        |        | Total Classified ROIs                                                          | User Accuracy (%) | Commission Error (%) |
|-------------------------|-------|--------------------------|--------|--------|--------|--------|--------------------------------------------------------------------------------|-------------------|----------------------|
|                         |       | C                        | F      | O      | U      | W      |                                                                                |                   |                      |
| Classification          | C     | 309                      | 17     | 125    | 43     | 1      | 495                                                                            | 62.42%            | 37.58%               |
|                         | F     | 7                        | 356    | 49     | 13     | 0      | 425                                                                            | 83.76%            | 16.24%               |
|                         | O     | 173                      | 52     | 343    | 80     | 52     | 700                                                                            | 49.00%            | 51.00%               |
|                         | U     | 98                       | 121    | 107    | 495    | 22     | 843                                                                            | 58.72%            | 41.28%               |
|                         | W     | 1                        | 0      | 14     | 0      | 111    | 126                                                                            | 88.10%            | 11.90%               |
| Total Ground Truth ROIs |       | 588                      | 546    | 635    | 631    | 186    | Kappa coefficient = 0.513<br>Overall Accuracy = 62.34% (95% CI: 60.44%–64.21%) |                   |                      |
| Producer Accuracy (%)   |       | 52.55%                   | 65.20% | 53.76% | 78.45% | 59.68% |                                                                                |                   |                      |
| Omission error (%)      |       | 47.45%                   | 34.80% | 46.24% | 21.55% | 40.32% |                                                                                |                   |                      |

| C5.0                    | Class | Ground Truth ROIs (2016) |        |        |        |        | Total Classified ROIs                                                          | User Accuracy (%) | Commission Error (%) |
|-------------------------|-------|--------------------------|--------|--------|--------|--------|--------------------------------------------------------------------------------|-------------------|----------------------|
|                         |       | C                        | F      | O      | U      | W      |                                                                                |                   |                      |
| Classification          | C     | 316                      | 18     | 145    | 37     | 3      | 519                                                                            | 60.89%            | 39.11%               |
|                         | F     | 17                       | 341    | 41     | 13     | 1      | 413                                                                            | 82.57%            | 17.43%               |
|                         | O     | 162                      | 56     | 315    | 72     | 49     | 654                                                                            | 48.17%            | 51.83%               |
|                         | U     | 92                       | 131    | 123    | 509    | 22     | 877                                                                            | 58.04%            | 41.96%               |
|                         | W     | 1                        | 0      | 14     | 0      | 111    | 126                                                                            | 88.10%            | 11.90%               |
| Total Ground Truth ROIs |       | 588                      | 546    | 635    | 631    | 186    | Kappa coefficient = 0.502<br>Overall Accuracy = 61.49% (95% CI: 59.59%–63.37%) |                   |                      |
| Producer Accuracy (%)   |       | 53.74%                   | 62.45% | 49.37% | 80.67% | 59.68% |                                                                                |                   |                      |
| Omission error (%)      |       | 46.26%                   | 37.55% | 50.63% | 19.33% | 40.32% |                                                                                |                   |                      |

<sup>1</sup> C: cropland; F: forest; O: others; U: urban (buildings); W: water.

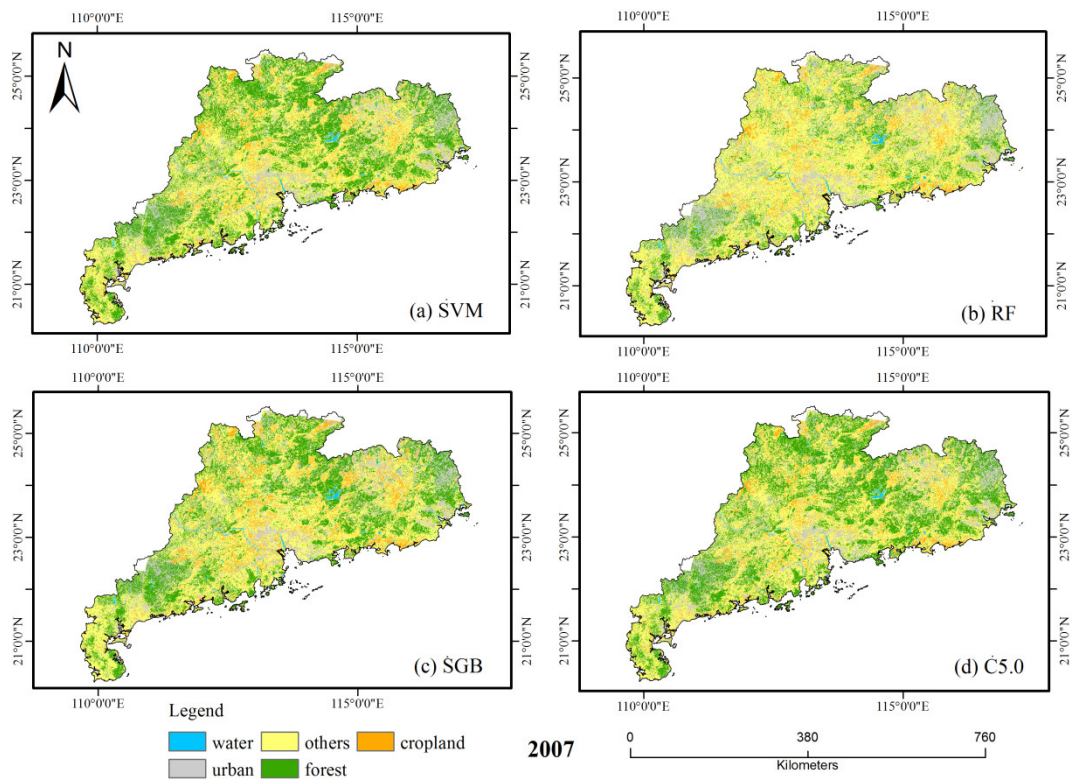

**Figure S2.** The 2007 land cover classifications based on SVM (a), RF (b), SGB (c), and C5.0 (d) in the Guangdong province of China.

**Table S2.** The accuracy assessment of forest and non-forest in 2005, 2010, and 2016.

|                            | Class | Ground Truth ROIs<br>(2005) |        | Total Classified<br>ROIs                                                       | User<br>Accuracy<br>(%) | Commission Error<br>(%) |
|----------------------------|-------|-----------------------------|--------|--------------------------------------------------------------------------------|-------------------------|-------------------------|
|                            |       | F                           | NF     |                                                                                |                         |                         |
| Classification             | F     | 431                         | 405    | 836                                                                            | 51.56%                  | 48.44%                  |
|                            | NF    | 124                         | 1329   | 1453                                                                           | 91.47%                  | 8.53%                   |
| Total Ground Truth<br>ROIs |       | 555                         | 1734   | Overall Accuracy = 76.89% (95% CI:75.11%–78.6%)<br>Kappa coefficient = 0.463   |                         |                         |
| Producer Accuracy (%)      |       | 77.66%                      | 76.64% |                                                                                |                         |                         |
| Omission error (%)         |       | 22.34%                      | 23.36% |                                                                                |                         |                         |
|                            | Class | Ground Truth ROIs<br>(2010) |        | Total Classified<br>ROIs                                                       | User<br>Accuracy<br>(%) | Commission Error<br>(%) |
|                            |       | F                           | NF     |                                                                                |                         |                         |
| Classification             | F     | 372                         | 233    | 605                                                                            | 61.49%                  | 38.51%                  |
|                            | NF    | 146                         | 1735   | 1881                                                                           | 92.24%                  | 7.76%                   |
| Total Ground Truth<br>ROIs |       | 518                         | 1968   | Overall Accuracy = 84.75 % (95% CI: 83.28%–86.2%)<br>Kappa coefficient = 0.565 |                         |                         |
| Producer Accuracy (%)      |       | 71.81%                      | 88.16% |                                                                                |                         |                         |
| Omission error (%)         |       | 28.19%                      | 11.84% |                                                                                |                         |                         |
|                            | Class | Ground Truth ROIs<br>(2016) |        | Total Classified<br>ROIs                                                       | User<br>Accuracy<br>(%) | Commission Error<br>(%) |
|                            |       | F                           | NF     |                                                                                |                         |                         |
| Classification             | F     | 467                         | 351    | 818                                                                            | 57.09%                  | 42.91%                  |
|                            | NF    | 79                          | 1692   | 1771                                                                           | 95.54%                  | 4.46%                   |
| Total Ground Truth<br>ROIs |       | 546                         | 2043   | Overall Accuracy = 83.39% (95% CI: 81.9%–84.81%)<br>Kappa coefficient = 0.578  |                         |                         |
| Producer Accuracy (%)      |       | 85.53%                      | 82.82% |                                                                                |                         |                         |

**Table S3.** Validation results of different forest and non-forest products in 2010.

| GLC30 (GD)              | Class | Ground Truth ROIs |        | Total Classified ROIs                              | User Accuracy (%) | Commission error (%) |
|-------------------------|-------|-------------------|--------|----------------------------------------------------|-------------------|----------------------|
|                         |       | F                 | NF     |                                                    |                   |                      |
| Classification          | F     | 463               | 299    | 762                                                | 60.76%            | 39.24%               |
|                         | NF    | 53                | 1656   | 1709                                               | 96.9%             | 3.1%                 |
| Total Ground Truth ROIs |       | 516               | 1955   | 2471                                               |                   |                      |
| Producer Accuracy (%)   |       | 89.73%            | 84.71% | Overall Accuracy = 85.75 % (95% CI: 84.31%–87.11%) |                   |                      |
| Omission error (%)      |       | 10.27%            | 15.29% | Kappa coefficient = 0.633                          |                   |                      |

  

| JAXA (GD)               | Class | Ground Truth ROIs |        | Total Classified ROIs                             | User Accuracy (%) | Commission error (%) |
|-------------------------|-------|-------------------|--------|---------------------------------------------------|-------------------|----------------------|
|                         |       | F                 | NF     |                                                   |                   |                      |
| Classification          | F     | 368               | 328    | 696                                               | 52.87%            | 47.13%               |
|                         | NF    | 148               | 1627   | 1775                                              | 91.66%            | 8.34%                |
| Total Ground Truth ROIs |       | 516               | 1955   | 2471                                              |                   |                      |
| Producer Accuracy (%)   |       | 71.32%            | 83.22% | Overall Accuracy = 80.74% (95 % CI:79.13%–82.27%) |                   |                      |
| Omission error (%)      |       | 28.68%            | 16.78% | Kappa coefficient = 0.483                         |                   |                      |

  

| This study (p122r043)   | Class | Ground Truth ROIs |        | Total Classified ROI                              | User Accuracy (%) | Commission error (%) |
|-------------------------|-------|-------------------|--------|---------------------------------------------------|-------------------|----------------------|
|                         |       | F                 | NF     |                                                   |                   |                      |
| Classification          | F     | 26                | 21     | 47                                                | 55.32 %           | 44.68 %              |
|                         | NF    | 2                 | 117    | 119                                               | 98.32 %           | 1.68 %               |
| Total Ground Truth ROIs |       | 28                | 138    | 166                                               |                   |                      |
| Producer Accuracy (%)   |       | 92.86%            | 84.78% | Overall Accuracy = 86.14% (95% CI: 79.94%–91.01%) |                   |                      |
| Omission error (%)      |       | 7.14%             | 15.22% | Kappa coefficient = 0.611                         |                   |                      |

  

| VCT (p122r043 )         | Class | Ground Truth ROIs |        | Total Classified ROI                             | User Accuracy (%) | Commission error (%) |
|-------------------------|-------|-------------------|--------|--------------------------------------------------|-------------------|----------------------|
|                         |       | F                 | NF     |                                                  |                   |                      |
| Classification          | F     | 26                | 14     | 40                                               | 65.0 %            | 35 %                 |
|                         | NF    | 2                 | 124    | 126                                              | 98.41 %           | 1.59 %               |
| Total Ground Truth ROIs |       | 28                | 138    | 166                                              |                   |                      |
| Producer Accuracy (%)   |       | 92.86%            | 89.86% | Overall Accuracy = 90.3% (95% CI: 84.82%–94.39%) |                   |                      |
| Omission error (%)      |       | 7.14%             | 10.14% | Kappa coefficient = 0.707                        |                   |                      |
